# Supplementary material for: Origin of Co-Expression Patterns in E.coli and S.cerevisiae Emerging from Reverse Engineering Algorithms
Source: PLOS journal article supplement (doi:10.1371/journal.pone.0002981), 2008-08-19
Supplement: S12 (10.1371/journal.pone.0002981.s012) [file journal.pone.0002981.s012]

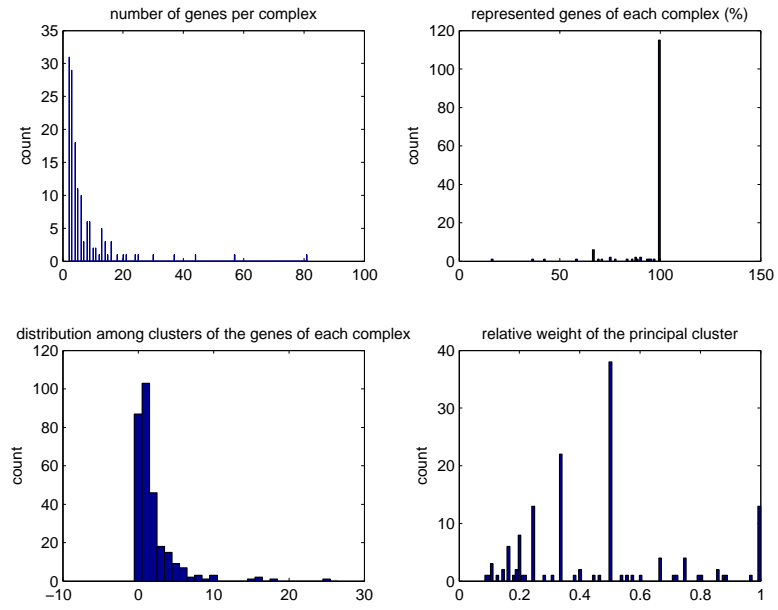

Figure S12: **Statistics for the clustered PC for *S. cerevisiae*.** Top left: histogram with the number of genes forming the PC; top right: histogram with the percentage of the PC-genes that are represented in the 1301 genes passing the correlation threshold in at least a case; bottom left: histogram of the number of clusters intersecting each PC; bottom right: histogram of the fraction of genes belonging to the “main” expression cluster for each PC.
