# Supplementary material for: Origin of Co-Expression Patterns in E.coli and S.cerevisiae Emerging from Reverse Engineering Algorithms
Source: PLOS journal article supplement (doi:10.1371/journal.pone.0002981), 2008-08-19
Supplement: S15 (10.1371/journal.pone.0002981.s015) [file journal.pone.0002981.s015]

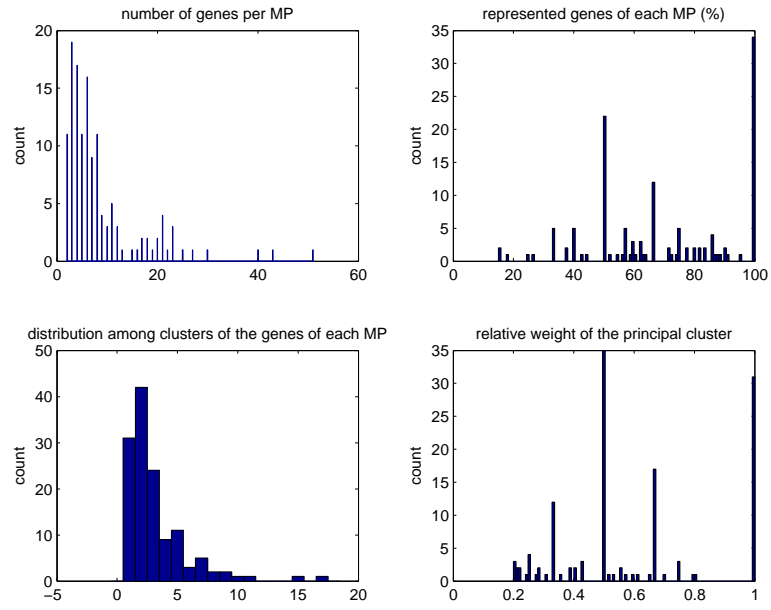

Figure S15: **Statistics for the clustered MP for *E. coli*.** Top left: histogram with the number of genes forming the MP; top right: histogram with the percentage of the enzymatic genes that are represented in the 1998 genes passing the correlation threshold; bottom left: histogram of the number of clusters intersecting the MP; bottom right: histogram of the fraction of genes belonging to the “main” expression cluster for each MP.
